# Supplementary material for: Space Station conditions are selective but do not alter microbial characteristics relevant to human health
Source: PubMed Central journal article supplement (PMC6728350; doi:10.1038/s41467-019-11682-z), 2019-09-05
Supplement: 41467_2019_11682_MOESM3_ESM.pdf [file 41467_2019_11682_MOESM3_ESM.pdf]

## **Description of Additional Supplementary Files**

File Name: Supplementary Data 1

Description: RSV table of RSVs retrieved from ISS session A, B,C. Sample names refer to the wipe names (e.g. A-1, A-2 etc.) as given in Table 1.

File Name: Supplementary Data 2

Description: Taxonomic diversity as inferred from metagenomic dataset.

File Name: Supplementary Data 3

Description: Microbial functions obtained from shot-gun metagenomic sequencing.

File Name: Supplementary Data 4

Description: Unique isolates obtained from ISS samples and partial 16S rRNA gene (Sanger sequencing).

File Name: Supplementary Data 5

Description: Decontam dataset, including the RSV table before decontam processing, RSV table after decontam purification and identified contaminants.
